# Supplementary material for: Clinical Outcomes and Provoked Epicardial Spasm Phenotypes via Intracoronary Acetylcholine Testing in 680 Patients with Angina and Nonobstructive Coronary Arteries
Source: MDPI journal article supplement (doi:10.3390/life12101465), 2022-09-21
Supplement: s1 [file s1]

## Supplementary Table S1

### Univariable and multivariable analysis between positive spasm and negative result

|                         | Univariable analysis |             |                  | Multivariable analysis |              |          |
|-------------------------|----------------------|-------------|------------------|------------------------|--------------|----------|
|                         | OR                   | 95% CI      | p value          | OR                     | 95% CI       | p value  |
| Age                     |                      |             | 0.869            |                        |              |          |
| Sex                     | 0.373                | 0.259-0.533 | 0.00000000987    | 0.732                  | 0.395-1.360  | 0.321    |
| Smoking                 | 3.031                | 2.124-4.357 | 0.000000000781   | 2.050                  | 1.120-3.750  | 0.0198   |
| Hypertension            | 0.899                | 0.650-1.243 | 0.526            |                        |              |          |
| Dyslipidemia            | 1.341                | 0.975-1.845 | 0.0614           | 1.320                  | 0.945-1.850  | 0.103    |
| Diabetes mellitus       | 0.800                | 0.533-1.194 | 0.286            |                        |              |          |
| LVEF by UCG             |                      |             | 0.316            |                        |              |          |
| Calcium channel blocker | 3.009                | 2.173-4.182 | 0.0000000000314  | 1.880                  | 1.280-2.770  | 0.00126  |
| ACEI/ARB                | 1.031                | 0.650-1.630 | 0.912            |                        |              |          |
| Nitrate or nicorandil   | 3.277                | 2.351-4.588 | 0.00000000000159 | 2.110                  | 1.430-3.120  | 0.000174 |
| Beta-blocker            | 0.598                | 0.292-1.179 | 0.120            |                        |              |          |
| Statin                  | 1.399                | 0.927-2.116 | 0.108            |                        |              |          |
| Aspirin                 | 1.835                | 1.150-2.953 | 0.00935          | 3.080                  | 0.824-11.500 | 0.0946   |
| Antiplatelet            | 1.619                | 1.042-2.529 | 0.025            | 0.366                  | 0.104-1.290  | 0.118    |

(LVEF: left ventricular ejection fraction, UCG: ultrasonography, ACEI: angiotensin-converting enzyme inhibitor, ARB: angiotensin receptor blocker)

## Supplementary Table S2

### Univariable and multivariable analysis between positive spasm and unclassified spasm

|                         | Univariable analysis |             |          | Multivariable analysis |             |         |
|-------------------------|----------------------|-------------|----------|------------------------|-------------|---------|
|                         | OR                   | 95% CI      | p value  | OR                     | 95% CI      | p value |
| Age                     |                      |             | 0.8329   |                        |             |         |
| Sex                     | 0.589                | 0.380-0.913 | 0.0132   | 0.761                  | 0.391-1.48  | 0.423   |
| Smoking                 | 1.752                | 1.131-2.714 | 0.00946  | 1.350                  | 0.703-2.590 | 0.367   |
| Hypertension            | 0.978                | 0.660-1.453 | 0.924    |                        |             |         |
| Dyslipidemia            | 1.091                | 0.743-1.605 | 0.707    |                        |             |         |
| Diabetes mellitus       | 0.739                | 0.459-1.195 | 0.199    |                        |             |         |
| LVEF by UCG             |                      |             | 0.2529   |                        |             |         |
| Calcium channel blocker | 1.881                | 1.275-2.780 | 0.000883 | 1.380                  | 0.893-2.120 | 0.148   |
| ACEI/ARB                | 1.109                | 0.632-1.984 | 0.788    |                        |             |         |
| Nitrate or nicorandil   | 2.251                | 1.523-3.347 | 0.000019 | 1.810                  | 1.180-2.800 | 0.00709 |
| Beta-blocker            | 0.809                | 0.338-1.995 | 0.678    |                        |             |         |
| Statin                  | 1.202                | 0.738-1.984 | 0.483    |                        |             |         |
| Aspirin                 | 1.484                | 0.857-2.638 | 0.159    |                        |             |         |
| Antiplatelet            | 1.196                | 0.721-2.015 | 0.544    |                        |             |         |

(LVEF: left ventricular ejection fraction, UCG: ultrasonography, ACEI: angiotensin-converting enzyme inhibitor, ARB: angiotensin receptor blocker)
